# Supplementary material
Source: Springer Nature journal article supplement (https://www.springermedizin.de/resource/supplementary/12889_2014_7007_MOESM5_ESM.pdf/9499598)

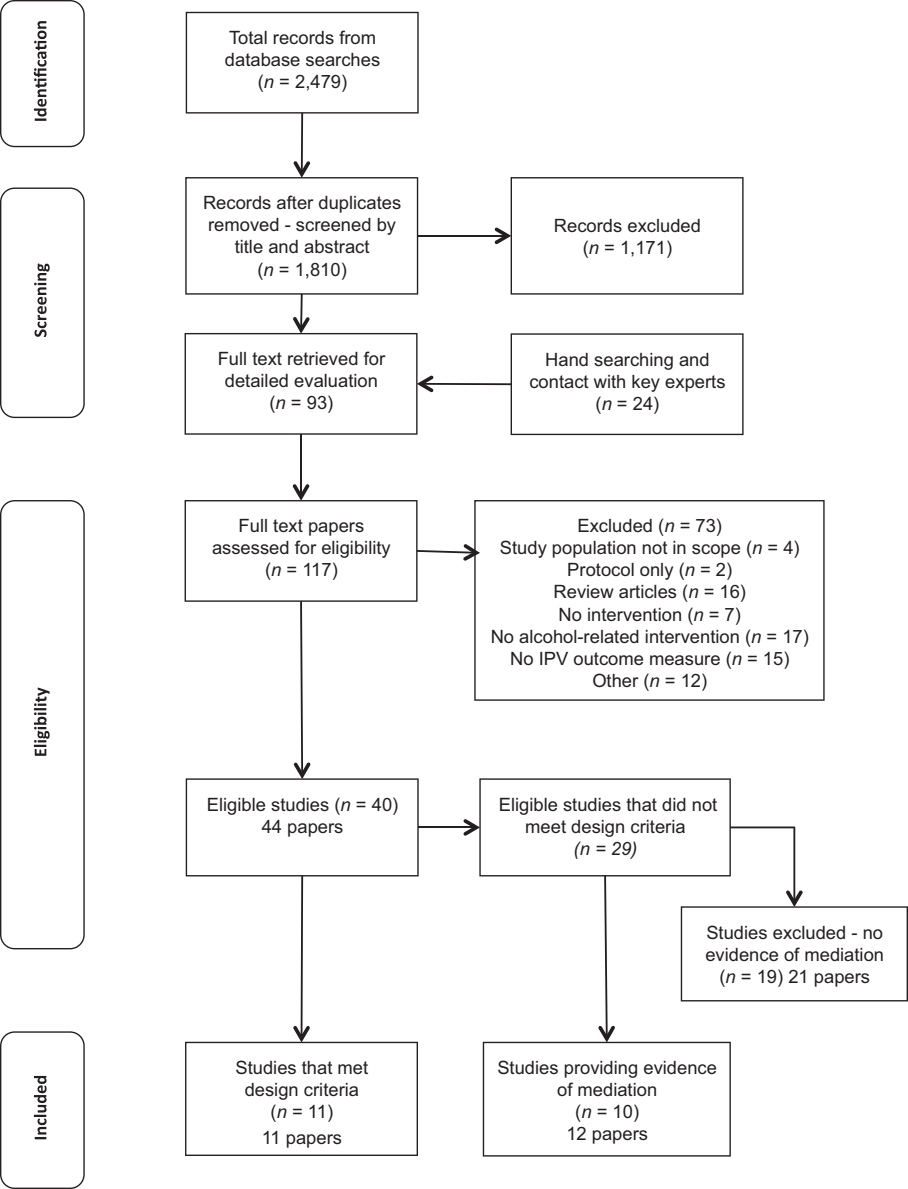

Supplement: MOESM5 [file 9499598]
